# Supplementary material
Source: publisher figshare collection journal article supplement (https://sage.figshare.com/ndownloader/files/23296967)
Supplement: Supplementary file 1 [file 23296967]

## Appendix I: Survey items and measurement properties

| Variable                                                                             | Item | Item Text                                                                                                | Included/<br>Removed | Factor<br>Loading | AVE   | CR    |       |
|--------------------------------------------------------------------------------------|------|----------------------------------------------------------------------------------------------------------|----------------------|-------------------|-------|-------|-------|
| <b>Entrepreneurial Intentions</b><br><br>Items 1-6 from Liñán & Chen (2009)          | EI1  | I am ready to do anything to be an entrepreneur.                                                         | Included             | 0.600             | 0.776 | 0.955 |       |
|                                                                                      | EI2  | My professional goal is to become an entrepreneur.                                                       | Included             | 0.645             |       |       |       |
|                                                                                      | EI3  | I will make every effort to start and run my own firm.                                                   | Included             | 0.714             |       |       |       |
|                                                                                      | EI4  | I am determined to create a firm in the future.                                                          | Included             | 0.704             |       |       |       |
|                                                                                      | EI5  | I have very seriously thought of starting a firm.                                                        | Included             | 0.659             |       |       |       |
|                                                                                      | EI6  | I have the firm intention to start a firm someday.                                                       | Included             | 0.656             |       |       |       |
| <b>Attitude</b><br><br>Items 1-5 from Liñán & Chen (2009) + authors' own item 6.     | ATT1 | Being an entrepreneur implies more advantages than disadvantages to me.                                  | Included             | 0.548             | 0.700 | 0.937 |       |
|                                                                                      | ATT2 | A career as entrepreneur is attractive for me                                                            | Included             | 0.676             |       |       |       |
|                                                                                      | ATT3 | If I had the opportunity and resources, I'd like to start a firm.                                        | Included             | 0.555             |       |       |       |
|                                                                                      | ATT4 | Being an entrepreneur will entail great satisfaction for me.                                             | Included             | 0.657             |       |       |       |
|                                                                                      | ATT5 | Among various options I would rather be an entrepreneur.                                                 | Included             | 0.642             |       |       |       |
|                                                                                      | ATT6 | I view the possibility of becoming an entrepreneur positively.                                           | Included             | 0.581             |       |       |       |
| <b>Self-Efficacy</b><br><br>Items 1-6 from Liñán & Chen (2009)                       | SE1  | To start a firm and keep it working would be easy for me.                                                | Removed              | 0.559             | 0.652 | 0.879 |       |
|                                                                                      | SE2  | I am prepared to start a viable firm.                                                                    | Removed              |                   |       |       |       |
|                                                                                      | SE3  | I can control the creation process of a new firm.                                                        | Included             |                   |       |       |       |
|                                                                                      | SE4  | I know the necessary practical details to start a firm.                                                  | Included             |                   |       |       | 0.800 |
|                                                                                      | SE5  | I know how to develop an entrepreneurial project.                                                        | Included             |                   |       |       | 0.787 |
|                                                                                      | SE6  | If I tried to start a firm, I would have a high probability of succeeding.                               | Included             |                   |       |       | 0.572 |
| <b>Social Norms</b><br><br>Items 1-3 from Liñán & Chen (2009) + authors' own item 4. |      | <i>If you decided to create a firm, would people in your close environment approve of that decision?</i> |                      |                   | 0.622 | 0.867 |       |
|                                                                                      | SN1  | Your close family                                                                                        | Included             | 0.772             |       |       |       |
|                                                                                      | SN2  | Your friends                                                                                             | Included             | 0.842             |       |       |       |
|                                                                                      | SN3  | Your colleagues                                                                                          | Included             | 0.698             |       |       |       |
|                                                                                      | SN4  | Your spouse/wife/husband/boyfriend/girlfriend                                                            | Included             | 0.712             |       |       |       |
| Note: AVE = Average Variance Extracted, CR = Composite Reliability                   |      |                                                                                                          |                      |                   |       |       |       |

## Appendix II: Course Descriptions

|                                 | <b>Compulsory Course</b>                                                                                                                                                                                                                                                                            | <b>Elective Course</b>                                                                                                                                                                                                                                                                                                                                            |
|---------------------------------|-----------------------------------------------------------------------------------------------------------------------------------------------------------------------------------------------------------------------------------------------------------------------------------------------------|-------------------------------------------------------------------------------------------------------------------------------------------------------------------------------------------------------------------------------------------------------------------------------------------------------------------------------------------------------------------|
| <b>Credit Points</b>            | 7.5 ECTS / 3.75 Credits (US)                                                                                                                                                                                                                                                                        | 7.5 ECTS / 3.75 Credits (US)                                                                                                                                                                                                                                                                                                                                      |
| <b>Content</b>                  | Entrepreneurship Theory, Innovation Theories, Entrepreneurial Mind-Set, Intrapreneurship, Opportunity Identification, Product Development, Social Entrepreneurship, Entrepreneurial Finance, Entrepreneurial Networks and Networking, Ethics in Entrepreneurship, Venture Growth.                   | Business Plan, Financial Planning, Entrepreneurial Marketing, Marketing Research, Marketing Communication, e-Business and e-Commerce for Entrepreneurs, Ethics in Entrepreneurship.                                                                                                                                                                               |
| <b>Course format</b>            | <p>14 in-class sessions during a single semester. 12 as frontal lectures + 2 student presentations.</p> <p>Students work on project outside class hours.</p> <p>Students receive three rounds of feedback on group project development.</p>                                                         | <p>12 full day class sessions (8 hours each) during a single semester. First half devoted to frontal lectures and guest lectures. Second half devoted to intensive supervised group work, feedback sessions, student presentations, expert meetings, etc</p> <p>Student groups receive 8-10 feedback sessions throughout course (based on need and progress).</p> |
| <b>Exercises</b>                | <p>10 individual multiple choice exercises at end of each unit (minimum delivery of 4)</p> <p>1 Group opportunity assessment project, including: (a) idea generation; (b) market analysis; (c) marketing strategy and basic financial planning</p> <p>Submitted in writing + class presentation</p> | <p>1 Group business plan project, presented gradually throughout the course in 4 presentations with external panels giving feedbacks.</p> <p>Final presentation arranged as competition before external panels and guests from public.</p>                                                                                                                        |
| <b>Source of group projects</b> | Students own ideas as emerging from idea generation exercise                                                                                                                                                                                                                                        | Student working with real entrepreneurs from outside university or with concrete student ventures                                                                                                                                                                                                                                                                 |
